# Supplementary material for: Comparative Longitudinal Serological Study of Anti-SARS-CoV-2 Antibody Profiles in People with COVID-19
Source: MDPI journal article supplement (doi:10.3390/microorganisms11081985), 2023-08-02
Supplement: s1 [file s1]

Supplementary Table S1. Dot blot assay for the N-protein, and the spike protein domains RBD, S1 and S2.

| Disease Severity | Patient No. | Gender | Age | DPSO | 0-100 days                          |       |       |       | Patient No. | DPSO | 101-200 days                        |       |       |       | Patient No. | DPSO | 201-300 days                        |       |       |       |
|------------------|-------------|--------|-----|------|-------------------------------------|-------|-------|-------|-------------|------|-------------------------------------|-------|-------|-------|-------------|------|-------------------------------------|-------|-------|-------|
|                  |             |        |     |      | Dot Blot Assay (Integrated Density) |       |       |       |             |      | Dot Blot Assay (Integrated Density) |       |       |       |             |      | Dot Blot Assay (Integrated Density) |       |       |       |
|                  |             |        |     |      | RBD                                 | S1    | S2    | N     |             |      | RBD                                 | S1    | S2    | N     |             |      | RBD                                 | S1    | S2    | N     |
| mild             | 1           | 1      | 43  | 80   | 42.6                                | 36.6  | 104.3 | 360.8 | 1           | 149  | 129.7                               | 91.8  | 87.5  | 257.7 | 1           | 262  | 67.4                                | 44.6  | 81.0  | 122.2 |
| mild             | 2           | 1      | 37  | 69   | 0.0                                 | 0.0   | 0.0   | 0.0   | 2           | 140  | 0.0                                 | 0.0   | 0.0   | 0.0   | 2           | 259  | 0.0                                 | 0.0   | 0.0   | 0.0   |
| mild             | 3           | 1      | 51  | 81   | 0.0                                 | 0.0   | 0.0   | 0.0   | 3           | 147  | 0.0                                 | 0.0   | 0.0   | 0.0   | 3           | 247  | 0.0                                 | 0.0   | 0.0   | 0.0   |
| mild             | 4           | 2      | 45  | 85   | 194.1                               | 72.5  | 262.9 | 446.1 | 4           | 144  | 229.5                               | 171.6 | 331.9 | 169.1 | 4           | 253  | 265.1                               | 172.4 | 267.6 | 79.7  |
| mild             | 5           | 1      | 44  | 19   | 191.3                               | 0.0   | 89.0  | 406.7 | 5           | 125  | 135.7                               | 70.2  | 0.0   | 289.9 |             |      |                                     |       |       |       |
| mild             |             |        |     | 34   | 152.8                               | 70.4  | 32.6  | 517.6 |             |      |                                     |       |       |       |             |      |                                     |       |       |       |
| mild             | 6           | 1      | 79  | 25   | 107.0                               | 0.0   | 50.6  | 677.5 |             |      |                                     |       |       |       |             |      |                                     |       |       |       |
|                  |             |        |     | 41   | 240.2                               | 15.0  | 46.8  | 666.5 |             |      |                                     |       |       |       |             |      |                                     |       |       |       |
|                  |             |        |     | 91   | 120.4                               | 43.8  | 162.0 | 772.3 |             |      |                                     |       |       |       |             |      |                                     |       |       |       |
| mild             | 7           | 2      | 63  | 38   | 76.6                                | 91.8  | 537.0 | 506.9 | 7           | 143  | 29.9                                | 10.5  | 308.0 | 208.4 | 7           | 236  | 0.0                                 | 0.0   | 122.0 | 114.5 |
| mild             | 8           | 2      | 58  | 44   | 62.2                                | 0.0   | 69.5  | 147.7 | 8           | 213  |                                     |       |       |       | 8           | 213  | 12.9                                | 0.0   | 136.1 | 39.4  |
|                  |             |        |     | 86   | 55.9                                | 0.0   | 61.1  | 141.4 |             |      |                                     |       |       |       |             |      |                                     |       |       |       |
| mild             | 9           | 2      | 49  | 57   | 0.0                                 | 0.0   | 64.3  | 39.3  | 9           | 114  | 0.0                                 | 0.0   | 57.0  | 32.8  | 9           | 273  | 0.0                                 | 0.0   | 41.1  | 3.1   |
| mild             | 10          | 2      | 58  | 66   | 27.4                                | 0.0   | 5.9   | 0.0   | 10          | 130  | 22.8                                | 0.0   | 0.0   | 0.0   | 10          | 270  | 16.8                                | 0.0   | 0.0   | 0.0   |
| mild             | 11          | 2      | 62  | 64   | 0.0                                 | 0.0   | 0.0   | 0.0   | 11          | 118  | 0.0                                 | 0.0   | 0.0   | 0.0   | 11          | 273  | 0.0                                 | 0.0   | 0.0   | 0.0   |
| mild             | 12          | 2      | 43  | 80   | 0.0                                 | 0.0   | 0.0   | 0.0   | 12          | 111  | 0.0                                 | 0.0   | 0.0   | 0.0   | 12          | 265  | 0.0                                 | 0.0   | 0.0   | 0.0   |
| mild             | 13          | 2      | 73  | 81   | 26.0                                | 0.0   | 92.8  | 282.1 | 13          | 117  | 12.3                                | 0.0   | 73.0  | 166.4 | 13          | 259  | 19.2                                | 0.0   | 115.9 | 9.3   |
| mild             | 14          | 2      | 27  | 83   | 57.7                                | 14.5  | 132.4 | 583.6 | 14          | 124  | 74.7                                | 75.0  | 287.1 | 502.4 | 14          | 271  | 51.2                                | 54.0  | 183.5 | 154.3 |
| mild             | 15          | 2      | 39  | 78   | 37.3                                | 53.9  | 128.8 | 60.9  | 15          | 119  | 21.1                                | 14.7  | 124.5 | 39.8  | 15          | 303  | 12.6                                | 9.1   | 38.0  | 4.0   |
| mild             | 16          | 2      | 73  | 50   | 53.0                                | 20.6  | 85.4  | 307.6 | 16          | 125  | 91.4                                | 81.2  | 98.6  | 172.2 | 16          | 260  | 66.3                                | 31.0  | 71.6  | 52.0  |
| mild             | 17          | 2      | 53  | 59   | 0.0                                 | 20.0  | 0.0   | 127.2 | 17          | 150  | 0.0                                 | 4.7   | 0.0   | 54.2  | 17          | 240  | 0.0                                 | 0.0   | 0.0   | 84.6  |
| mild             | 18          | 1      | 51  | 61   | 114.6                               | 44.8  | 283.8 | 441.2 | 18          | 110  | 86.0                                | 49.6  | 228.5 | 330.7 | 18          | 229  | 79.9                                | 54.6  | 254.9 | 205.3 |
| mild             | 19          | 2      | 57  | 69   | 229.8                               | 78.3  | 259.1 | 559.0 | 19          | 144  | 262.6                               | 130.8 | 135.2 | 380.6 | 19          | 237  | 166.2                               | 121.6 | 131.9 | 234.1 |
| mild             | 20          | 2      | 21  | 71   | 109.5                               | 56.0  | 60.3  | 212.0 | 20          | 169  | 86.2                                | 40.3  | 46.7  | 186.5 | 20          | 231  | 86.1                                | 40.2  | 39.2  | 90.9  |
| mild             | 21          | 2      | 82  | 69   | 85.5                                | 48.6  | 267.4 | 578.5 | 21          | 144  | 95.9                                | 49.7  | 234.6 | 472.9 | 21          | 237  | 128.3                               | 83.2  | 355.1 | 466.0 |
| mild             | 22          | 1      | 27  | 61   | 21.9                                | 26.9  | 145.8 | 52.3  | 22          | 152  | 42.1                                | 31.3  | 128.3 | 44.3  | 22          | 257  | 67.6                                | 54.3  | 158.1 | 58.3  |
| mild             | 23          | 1      | 77  | 56   | 101.7                               | 62.7  | 95.9  | 694.0 | 23          | 154  | 73.9                                | 24.5  | 57.5  | 628.2 | 23          | 217  | 37.6                                | 14.4  | 24.8  | 387.8 |
| mild             | 24          | 1      | 79  | 73   | 0.0                                 | 0.0   | 262.1 | 413.7 | 24          | 117  | 0.0                                 | 0.0   | 215.4 | 199.5 |             |      |                                     |       |       |       |
|                  |             |        |     |      |                                     |       |       |       | 24          | 178  | 0.0                                 | 0.0   | 181.8 | 75.1  |             |      |                                     |       |       |       |
| mild             | 25          | 1      | 71  | 74   | 0.0                                 | 0.0   | 0.0   | 109.2 | 25          | 165  | 0.0                                 | 0.0   | 0.0   | 42.7  | 25          | 235  | 0.0                                 | 0.0   | 0.0   | 68.0  |
| mild             | 26          | 1      | 78  | 73   | 40.2                                | 90.3  | 197.5 | 458.9 | 26          | 138  | 238.5                               | 169.2 | 138.4 | 327.6 | 26          | 247  | 254.7                               | 59.3  | 96.2  | 181.0 |
| mild             | 27          | 2      | 20  | 45   | 73.5                                | 6.2   | 23.6  | 327.8 | 27          | 117  | 67.2                                | 21.0  | 103.3 | 206.5 | 27          | 226  | 108.7                               | 40.6  | 192.9 | 155.7 |
| mild             | 28          | 1      | 50  | 59   | 0.0                                 | 0.0   | 0.0   | 0.0   |             |      |                                     |       |       |       | 28          | 218  | 0.0                                 | 0.0   | 0.0   | 0.0   |
|                  |             |        |     | 92   | 0.0                                 | 0.0   | 0.0   | 0.0   |             |      |                                     |       |       |       |             |      |                                     |       |       |       |
| mild             | 29          | 2      | 58  | 48   | 227.3                               | 109.1 | 212.3 | 446.1 | 29          | 111  | 215.6                               | 98.4  | 195.7 | 169.5 | 29          | 202  | 117.4                               | 87.8  | 179.9 | 88.9  |
| mild             | 30          | 1      | 82  | 80   | 74.2                                | 35.4  | 125.8 | 404.4 | 30          | 106  | 38.3                                | 30.3  | 106.7 | 351.0 |             |      |                                     |       |       |       |
|                  |             |        |     |      |                                     |       |       |       | 30          | 155  | 107.0                               | 59.0  | 164.8 | 343.8 |             |      |                                     |       |       |       |
|                  |             |        |     |      |                                     |       |       |       | 30          | 185  | 44.6                                | 29.8  | 62.7  | 185.7 |             |      |                                     |       |       |       |
| mild             | 31          | 2      | 31  | 83   | 0.0                                 | 0.0   | 121.4 | 0.0   | 31          | 124  | 0.0                                 | 8.7   | 132.1 | 0.0   | 31          | 216  | 0.0                                 | 0.0   | 94.0  | 0.0   |
| mild             | 32          | 2      | 45  | 97   | 0.0                                 | 0.0   | 0.0   | 0.0   | 32          | 125  | 0.0                                 | 0.0   | 0.0   | 0.0   |             |      |                                     |       |       |       |
|                  |             |        |     |      |                                     |       |       |       |             | 188  | 0.0                                 | 0.0   | 0.0   | 0.0   |             |      |                                     |       |       |       |
| moderate         | 33          | 2      | 67  |      |                                     |       |       |       | 33          | 117  | 0.0                                 | 0.0   | 0.0   | 0.0   | 33          | 309  | 0.0                                 | 0.0   | 0.0   | 0.0   |
| moderate         | 34          | 1      | 64  | 30   | 0.0                                 | 0.0   | 0.0   | 0.0   | 34          | 126  | 0.0                                 | 0.0   | 0.0   | 0.0   |             |      |                                     |       |       |       |
| moderate         | 35          | 1      | 40  | 70   | 0.0                                 | 0.0   | 0.0   | 0.0   | 35          | 115  | 0.0                                 | 0.0   | 0.0   | 0.0   | 35          | 242  | 0.0                                 | 0.0   | 0.0   | 0.0   |
| moderate         | 36          | 1      | 67  | 43   | 81.9                                | 15.5  | 114.5 | 354.7 | 36          | 129  | 25.8                                | 0.0   | 29.4  | 162.8 | 36          | 231  | 72.6                                | 0.0   | 65.2  | 134.4 |
| moderate         | 37          | 2      | 67  | 42   | 58.6                                | 32.1  | 76.1  | 390.2 | 37          | 134  | 120.2                               | 48.4  | 86.4  | 496.3 | 37          | 238  | 121.0                               | 27.3  | 60.8  | 266.4 |
| moderate         | 38          | 1      | 59  | 56   | 0.0                                 | 0.0   | 67.4  | 236.1 | 38          | 133  | 0.0                                 | 0.0   | 32.0  | 108.5 | 38          | 253  | 0.0                                 | 0.0   | 43.9  | 101.9 |
| moderate         | 39          | 2      | 21  | 63   | 0.0                                 | 0.0   | 0.0   | 0.0   | 39          | 118  | 0.0                                 | 0.0   | 0.0   | 0.0   | 39          | 300  | 0.0                                 | 0.0   | 0.0   | 0.0   |
| moderate         | 40          | 2      | 34  | 65   | 0.0                                 | 0.0   | 0.0   | 0.0   | 40          | 119  | 0.0                                 | 0.0   | 0.0   | 0.0   | 40          | 274  | 0.0                                 | 0.0   | 0.0   | 0.0   |
| moderate         | 41          | 2      | 47  | 60   | 0.0                                 | 0.0   | 0.0   | 0.0   | 41          | 139  | 0.0                                 | 0.0   | 0.0   | 0.0   | 41          | 269  | 0.0                                 | 0.0   | 0.0   | 0.0   |
| moderate         | 42          | 1      | 35  | 44   | 0.0                                 | 0.0   | 0.0   | 0.0   | 42          | 101  | 0.0                                 | 0.0   | 0.0   | 0.0   | 42          | 236  | 0.0                                 | 0.0   | 0.0   | 0.0   |
| moderate         | 43          | 1      | 62  | 80   | 0.0                                 | 0.0   | 15.8  | 710.9 | 43          | 114  | 19.2                                | 0.0   | 28.4  | 687.9 | 43          | 261  | 19.2                                | 0.0   | 5.9   | 416.1 |
| moderate         | 44          | 2      | 33  | 63   | 80.2                                | 9.2   | 536.5 | 646.2 | 44          | 160  | 40.5                                | 13.6  | 338.5 | 255.0 | 44          | 238  | 67.2                                | 23.4  | 290.8 | 74.4  |
| moderate         | 45          | 2      | 76  | 74   | 0.0                                 | 0.0   | 141.9 | 102.2 | 45          | 172  | 0.0                                 | 0.0   | 195.7 | 31.6  | 45          | 235  | 0.0                                 | 0.0   | 279.7 | 19.2  |
| moderate         | 46          | 1      | 40  | 67   | 79.4                                | 0.0   | 147.0 | 379.7 | 46          | 159  | 49.0                                | 0.0   | 125.9 | 331.6 | 46          | 256  | 52.9                                | 0.0   | 113.4 | 207.1 |
| moderate         | 47          | 1      | 33  | 85   | 200.9                               | 89.4  | 268.5 | 739.4 | 47          | 126  | 163.1                               | 88.2  | 331.7 | 845.4 | 47          | 218  | 126.1                               | 83.0  | 371.6 | 462.6 |
| moderate         | 48          | 2      | 35  | 61   | 280.3                               | 142.3 | 249.6 | 721.9 | 48          | 152  | 381.4                               | 229.5 | 135.4 | 702.3 |             |      |                                     |       |       |       |
|                  |             |        |     | 89   | 408.7                               | 188.2 | 363.3 | 712.4 | 48          | 188  | 384.2                               | 199.7 | 346.7 | 675.7 |             |      |                                     |       |       |       |
| moderate         | 49          | 2      | 76  | 83   | 101.6                               | 61.1  | 107.9 | 630.5 | 49          | 111  | 47.7                                | 20.8  | 11.0  | 533.2 |             |      |                                     |       |       |       |
|                  |             |        |     |      |                                     |       |       |       |             | 174  | 97.9                                | 20.1  | 0.0   | 366.2 |             |      |                                     |       |       |       |
| severe           | 50          | 1      | 61  |      |                                     |       |       |       | 50          | 152  | 45.5                                | 89.6  | 234.9 | 598.1 | 50          | 228  | 141.7                               | 87.0  | 252.5 | 527.2 |
| severe           | 51          | 1      | 75  |      |                                     |       |       |       | 51          | 139  | 109.6                               | 74.6  | 179.2 | 735.5 | 51          | 247  | 78.9                                | 74.4  | 163.3 | 414.1 |
| severe           | 52          | 1      | 87  |      |                                     |       |       |       | 52          | 151  | 263.5                               | 98.7  | 265.4 | 457.1 | 52          | 243  | 258.6                               | 98.1  | 216.0 | 281.8 |
| severe           | 53          | 1      | 71  |      |                                     |       |       |       | 53          | 145  | 95.0                                | 87.7  | 117.6 | 732.5 | 53          | 233  | 53.5                                | 70.8  | 130.1 |       |
