# Supplementary material for: Comparative Longitudinal Serological Study of Anti-SARS-CoV-2 Antibody Profiles in People with COVID-19
Source: MDPI journal article supplement (doi:10.3390/microorganisms11081985), 2023-08-02
Supplement: s1 [file s1]

**Suppl. Table S3. Testing of sera with broad-anti-S, narrow anti-S or undetectable levels of anti-S antibodies with an receptor binding inhibition assay (sVNT)**

| Broad anti-S        | Patient No. | Age | DPSO | 0-100 days<br>sVNT                | DPSO | 101-200 days<br>sVNT              | DPSO | 201-300 days<br>sVNT              |
|---------------------|-------------|-----|------|-----------------------------------|------|-----------------------------------|------|-----------------------------------|
| mild                | 1           | 43  | 80   | 91.8                              | 149  | 83.4                              | 262  | 79.7                              |
|                     | 4           | 45  | 85   | 94.3                              | 144  | 96.3                              | 253  | 97.5                              |
|                     | 5           | 44  | 19   | 92.3                              | 125  | 81.0                              |      |                                   |
|                     |             |     | 34   | 91.3                              |      |                                   |      |                                   |
|                     | 6           | 79  | 25   | 68.7                              |      |                                   |      |                                   |
|                     |             |     | 41   | 70.3                              |      |                                   |      |                                   |
|                     |             |     | 91   | 79.3                              |      |                                   |      |                                   |
|                     | 7           | 63  | 38   | 91.1                              | 143  | 82.8                              | 236  | 83.6                              |
|                     | 14          | 27  | 83   | 74.1                              | 124  | 70.5                              | 271  | 71.2                              |
|                     | 15          | 39  | 78   | ND                                | 119  | ND                                | 303  | ND                                |
|                     | 16          | 73  | 50   | 31.9                              | 125  | 21.8                              | 260  | ND                                |
|                     | 18          | 51  | 61   | 88.3                              | 110  | 92.1                              | 229  | 86.1                              |
|                     | 19          | 57  | 69   | 98.6                              | 144  | 98.2                              | 237  | 96.3                              |
|                     | 20          | 21  | 71   | 73.1                              | 169  | 66.2                              | 231  | 58.7                              |
|                     | 21          | 82  | 69   | 93.1                              | 144  | 90.3                              | 237  | 84.7                              |
|                     | 22          | 27  | 61   | 44.9                              | 152  | 56.0                              | 257  | 55.5                              |
|                     | 23          | 77  | 56   | 76.3                              | 154  | 55.8                              | 217  | 50.9                              |
|                     | 26          | 78  | 73   | 96.8                              | 138  | 96.4                              | 247  | 90.4                              |
|                     | 27          | 20  | 45   | 57.1                              | 117  | 50.0                              | 226  | 52.0                              |
|                     | 29          | 58  | 48   | 87.5                              | 111  | 77.9                              | 202  | 66.0                              |
|                     | 30          | 82  | 80   | 48.3                              | 106  | 36.6                              |      |                                   |
|                     |             |     |      |                                   | 155  | 35.6                              |      |                                   |
|                     |             |     |      |                                   | 185  | 24.6                              |      |                                   |
|                     | 37          | 67  | 42   | 97.4                              | 134  | 96.5                              | 238  | 97.4                              |
|                     | 44          | 33  | 63   | 95.1                              | 160  | 84.4                              | 238  | 83.7                              |
|                     | 47          | 33  | 85   | 81.8                              | 126  | 77.7                              | 218  | 77.5                              |
|                     | 48          | 35  | 61   | 95.7                              | 152  | 87.7                              |      |                                   |
|                     |             |     | 89   | 95.3                              | 188  | 88.5                              |      |                                   |
|                     | 49          | 76  | 83   | 74.5                              | 111  | 89.1                              |      |                                   |
|                     |             |     |      |                                   | 174  | 98.7                              |      |                                   |
|                     | 50          | 61  |      |                                   | 152  | 88.5                              | 228  | 87.0                              |
|                     | 51          | 75  |      |                                   | 139  | 74.6                              | 247  | 74.4                              |
|                     | 52          | 87  |      |                                   | 151  | 98.7                              | 243  | 98.1                              |
|                     | 53          | 71  |      |                                   | 145  | 87.7                              | 233  | 70.8                              |
|                     | 54          | 42  | 42   | 98.0                              |      |                                   | 252  | 95.8                              |
|                     | 56          | 84  | 87   | 91.8                              | 156  | 88.5                              |      |                                   |
|                     | 57          | 56  |      |                                   | 161  | 89.1                              | 245  | 88.4                              |
|                     | 58          | 72  | 49   | 97.1                              | 110  | 98.7                              |      |                                   |
|                     | 59          | 61  | 93   | 96.8                              | 170  | 88.5                              |      |                                   |
|                     | 60          | 55  | 90   | 95.6                              |      |                                   |      |                                   |
|                     | 61          | 72  | 16   | 90.8                              |      |                                   |      |                                   |
|                     |             |     | 22   | 93.5                              |      |                                   |      |                                   |
|                     | 62          | 57  | 22   | 94.5                              |      |                                   |      |                                   |
|                     |             |     | 27   | 95.3                              |      |                                   |      |                                   |
|                     |             |     |      | Median 91.55<br>IQR (95.3-74.2)   |      | Median 86.05<br>IQR (90.75-63.65) |      | Median 81.65<br>IQR (89.90-60.53) |
| Restricted-anti-S   |             |     |      |                                   |      |                                   |      |                                   |
| mild                | 8           | 58  | 44   | 65.3                              |      |                                   | 213  | 37.3                              |
|                     |             |     | 86   | 52.4                              |      |                                   |      |                                   |
|                     | 9           | 49  | 57   | ND                                | 114  | ND                                | 273  | ND                                |
|                     | 10          | 58  | 66   | ND                                | 130  | ND                                | 270  | ND                                |
|                     | 13          | 73  | 81   | 61.6                              | 117  | 50.7                              | 259  | 43.9                              |
|                     | 17          | 53  | 59   | 63.2                              | 150  | 65.6                              | 240  | 57.2                              |
|                     | 24          | 79  | 73   | 64.5                              | 117  | 57.3                              |      |                                   |
|                     |             |     |      |                                   | 178  | 43.6                              |      |                                   |
|                     | 31          | 31  | 83   | 34.9                              | 124  | 26.9                              | 216  | ND                                |
|                     | 36          | 67  | 43   | 98.8                              | 129  | 96.2                              | 231  | 83.9                              |
|                     | 38          | 59  | 56   | 86.2                              | 133  | 76.3                              | 253  | 60.3                              |
|                     | 43          | 62  | 80   | 52.5                              | 114  | 47.9                              | 261  | 32.0                              |
|                     | 45          | 76  | 74   | 44.3                              | 172  | 33.4                              | 235  | 39.5                              |
|                     | 46          | 40  | 67   | 30.6                              | 159  | 21.1                              | 256  | 26.7                              |
|                     | 55          | 36  | 39   | 96.10                             |      |                                   | 215  | 88.7                              |
|                     |             |     |      | Median 57.05<br>IQR (70.53-33.83) |      | Median 45.75<br>IQR (63.53-22.55) |      | Median 38.40<br>IQR (59.53-6.68)  |
| Anti-S Not Detected |             |     |      |                                   |      |                                   |      |                                   |
| mild                | 2           | 37  | 69   | 40.5                              | 140  | 27.9                              | 259  | 22.3                              |
|                     | 3           | 51  | 81   | 44.2                              | 147  | 24.1                              | 247  | ND                                |
|                     | 11          | 62  | 64   | ND                                | 118  | ND                                | 273  | ND                                |
|                     | 12          | 43  | 80   | 25.7                              | 111  | 23.9                              | 265  | 29.8                              |
|                     | 25          | 71  | 74   | 30.3                              | 165  | 20.6                              | 235  | ND                                |
|                     | 28          | 50  | 59   | 33.9                              |      |                                   | 218  | ND                                |
|                     |             |     | 92   | 24.2                              |      |                                   |      |                                   |
|                     | 32          | 45  | 97   | ND                                | 125  | 22.7                              |      |                                   |
|                     |             |     |      |                                   | 188  | 27.2                              |      |                                   |
|                     | 33          | 67  |      |                                   | 117  | 82.6                              | 309  | 95.2                              |
|                     | 34          | 64  | 30   | 76.9                              | 126  | ND                                |      |                                   |
|                     | 35          | 40  | 70   | 36.6                              | 115  | 37.1                              | 242  | 33.3                              |
|                     | 39          | 21  | 63   | 28.2                              | 118  | 25                                | 300  | 36.3                              |
|                     | 40          | 34  | 65   | 21.8                              | 119  | 20                                | 274  | ND                                |
|                     | 41          | 47  | 60   | 44.3                              | 139  | 50.4                              | 269  | 47                                |
|                     | 42          | 35  | 44   | ND                                | 101  | ND                                | 236  | ND                                |
|                     | 63          | 46  | 21   | ND                                |      |                                   |      |                                   |
|                     |             |     | 23   | ND                                |      |                                   |      |                                   |
|                     |             |     | 29   | ND                                |      |                                   |      |                                   |
|                     |             |     |      | Median 28.2<br>IQR (40.5-28.2)    |      | Median 24<br>IQR (30.2-15)        |      | Median 11.15<br>IQR (35.55-0)     |

ND: Not detected; calculated as inhibition 0%
