# Supplementary material for: Comparative Longitudinal Serological Study of Anti-SARS-CoV-2 Antibody Profiles in People with COVID-19
Source: MDPI journal article supplement (doi:10.3390/microorganisms11081985), 2023-08-02
Supplement: s1 [file s1]

## Supplement Table S2

Participants with no detectable anti-COVID-19 antibodies in the dot blot analysis

| Participant | Co-morbidities                                                                                                                          |
|-------------|-----------------------------------------------------------------------------------------------------------------------------------------|
| 02          | No documented co-morbidities                                                                                                            |
| 03          | No documented co-morbidities                                                                                                            |
| 11          | Smoker, bladder infection, Keflex (Cephalosporin antibiotic), Hiprex PRN                                                                |
| 12          | No documented co-morbidities                                                                                                            |
| 28          | Gout, obesity, hypertension                                                                                                             |
| 32          | Thyroid Hashimoto's disease, Eutroxsig                                                                                                  |
| 33          | Benign pituitary tumor, resection 2015, Thyroxine                                                                                       |
| 34          | No documented co-morbidities                                                                                                            |
| 35          | Smoker                                                                                                                                  |
| 39          | No documented co-morbidities                                                                                                            |
| 40          | Smoker                                                                                                                                  |
| 41          | No documented co-morbidities                                                                                                            |
| 42          | No documented co-morbidities                                                                                                            |
| 63          | Chronic kidney disease, renal tumor, follicular non-Hodgkin lymphoma on remission, <b>Rituximab</b> , Moxifloxacin, Clexane, Remdesivir |

PRN: pro re nata
